# Supplementary material for: Theta-burst microstimulation in the human entorhinal area improves memory specificity
Source: eLife. 2017 Oct 24;6:e29515. doi: 10.7554/eLife.29515 (PMC5655155; doi:10.7554/eLife.29515)
Supplement: Figure 3—source data 1. [file elife-29515-fig3-data1.xlsx]

## Sheet: Stim - Nonstim
ParticipantID	StimHemisphere	whiteMatter	block number	items per set	REMEMBEREDRATE	DI	TARGETACCEPTANCERATE	LUREREJECTIONRATE	stimInSOZ
1	left	1	1	10	-0.1	-0.1	-0.1	0	0
1	left	1	2	10	0.1	0.2	0.3	-0.1	0
1	left	1	3	10	-0.3	-0.3	0.2	-0.5	0
1	left	1	4	10	0	0	0	0	0
1	left	1	5	15	0	0	-0.066667	0.066666	0
2	right	1	1	14	0.285714	0.285715	0.285715	0	1
2	right	1	2	14	-0.142857	-0.214286	-0.142857	-0.071429	1
2	right	1	3	14	0.642857	0.785715	0.214285	0.571428	1
2	right	1	4	14	0	0	-0.142857	0.142857	1
3	left	0	1	10	0	-0.1	0	-0.1	1
3	left	0	2	8	0.375	0.25	0	0.25	1
3	left	0	3	8	-0.125	0	-0.125	0.125	1
3	left	0	4	8	-0.125	-0.125	0.25	-0.375	1
3	left	0	5	8	-0.125	-0.25	-0.5	0.25	1
3	left	0	6	8	0.125	0.25	0.125	0.125	1
3	left	0	7	8	-0.125	0	0	0	1
4	left	1	1	16	-0.125	-0.0625	-0.25	0.1875	0
4	left	1	2	14	0.428572	0.5	0.428571	0.071429	0
4	left	1	3	14	-0.428572	-0.5	-0.428571	-0.071428	0
4	left	1	4	14	0.357143	0.285714	0.428572	-0.142857	0
5	left	0	1	10	-0.1	-0.1	0	-0.1	0
5	left	0	2	20	-0.15	-0.15	-0.05	-0.1	0
6	left	0	1	14	-0.142857	-0.142857	-0.071429	-0.071429	0
6	left	0	2	19	0.052631	0	-0.157895	0.157894	0
6	right	0	3	26	0.076923	0.115384	0	0.115384	1
7	right	0	1	14	0.142857	0.142857	0.071428	0.071429	1
7	right	0	2	14	-0.071428	-0.142857	0	-0.142857	1
7	right	0	3	26	-0.038461	-0.038461	-0.038462	0	1
8	right	1	1	19	0.315789	0.315789	0.263158	0.052631	0
8	right	1	2	24	0.125	0.125	0.125	0	0
9	right	1	1	14	0.214285	0.214285	0.142857	0.071429	0
9	right	1	2	14	0.142857	0.142857	0.142857	0	0
10	right	1	1	20	0.05	0.05	-0.05	0.1	0
10	right	1	2	30	-0.1	-0.133333	-0.133333	0	0
11	right	1	1	15	-0.133333	-0.133333	-0.133334	0	0
11	right	1	2	20	0.35	0.35	0.25	0.1	0
12	right	1	1	14	0.285714	0.214286	0.142858	0.071428	1
13	right	0	1	20	0.1	0.1	0.05	0.05	0
13	right	0	2	26	0	-0.076923	0	-0.076923	0
13	left	1	3	17.5	0.042484	0.098039	0.052287	0.045751	0

## Sheet: Stim and Nonstim Results
Patient	stimHemishpere	block number	items per set	stim	targets accepted	target rate	lures rejected	lure rate	discrimination index	recall	rememberedRate
1	left	1	10	0	9	0.9	6	0.6	0.5	5	0.5
1	left	1	10	1	8	0.8	6	0.6	0.4	4	0.4
1	left	2	10	0	6	0.6	7	0.7	0.3	4	0.4
1	left	2	10	1	9	0.9	6	0.6	0.5	5	0.5
1	left	3	10	0	7	0.7	10	1	0.7	7	0.7
1	left	3	10	1	9	0.9	5	0.5	0.4	4	0.4
1	left	4	10	0	10	1	9	0.9	0.9	9	0.9
1	left	4	10	1	10	1	9	0.9	0.9	9	0.9
1	left	5	15	0	15	1	10	0.666667	0.666667	10	0.666667
1	left	5	15	1	14	0.933333	11	0.733333	0.666667	10	0.666667
2	right	1	14	0	6	0.428571	7	0.5	-0.071429	1	0.071429
2	right	1	14	1	10	0.714286	7	0.5	0.214286	5	0.357143
2	right	2	14	0	11	0.785714	12	0.857143	0.642857	9	0.642857
2	right	2	14	1	9	0.642857	11	0.785714	0.428571	7	0.5
2	right	3	14	0	10	0.714286	3	0.214286	-0.071429	1	0.071429
2	right	3	14	1	13	0.928571	11	0.785714	0.714286	10	0.714286
2	right	4	14	0	13	0.928571	7	0.5	0.428571	7	0.5
2	right	4	14	1	11	0.785714	9	0.642857	0.428571	7	0.5
3	left	1	10	0	5	0.5	7	0.7	0.2	4	0.4
3	left	1	10	1	5	0.5	6	0.6	0.1	4	0.4
3	left	2	8	0	6	0.75	3	0.375	0.125	2	0.25
3	left	2	8	1	6	0.75	5	0.625	0.375	5	0.625
3	left	3	8	0	6	0.75	6	0.75	0.5	5	0.625
3	left	3	8	1	5	0.625	7	0.875	0.5	4	0.5
3	left	4	8	0	5	0.625	5	0.625	0.25	3	0.375
3	left	4	8	1	7	0.875	2	0.25	0.125	2	0.25
3	left	5	8	0	8	1	4	0.5	0.5	4	0.5
3	left	5	8	1	4	0.5	6	0.75	0.25	3	0.375
3	left	6	8	0	6	0.75	4	0.5	0.25	3	0.375
3	left	6	8	1	7	0.875	5	0.625	0.5	4	0.5
3	left	7	8	0	7	0.875	4	0.5	0.375	4	0.5
3	left	7	8	1	7	0.875	4	0.5	0.375	3	0.375
4	left	1	16	0	8	0.5	12	0.75	0.25	6	0.375
4	left	1	16	1	4	0.25	15	0.9375	0.1875	4	0.25
4	left	2	14	0	5	0.357143	11	0.785714	0.142857	4	0.285714
4	left	2	14	1	11	0.785714	12	0.857143	0.642857	10	0.714286
4	left	3	14	0	13	0.928571	13	0.928571	0.857143	12	0.857143
4	left	3	14	1	7	0.5	12	0.857143	0.357143	6	0.428571
4	left	4	14	0	6	0.428571	13	0.928571	0.357143	5	0.357143
4	left	4	14	1	12	0.857143	11	0.785714	0.642857	10	0.714286
5	left	1	10	0	10	1	10	1	1	10	1
5	left	1	10	1	10	1	9	0.9	0.9	9	0.9
5	left	2	20	0	20	1	17	0.85	0.85	17	0.85
5	left	2	20	1	19	0.95	15	0.75	0.7	14	0.7
6	left	1	14	0	14	1	12	0.857143	0.857143	12	0.857143
6	left	1	14	1	13	0.928571	11	0.785714	0.714286	10	0.714286
6	left	2	19	0	19	1	13	0.684211	0.684211	13	0.684211
6	left	2	19	1	16	0.842105	16	0.842105	0.684211	14	0.736842
6	right	3	26	0	24	0.923077	20	0.769231	0.692308	19	0.730769
6	right	3	26	1	24	0.923077	23	0.884615	0.807692	21	0.807692
7	right	1	14	0	12	0.857143	13	0.928571	0.785714	11	0.785714
7	right	1	14	1	13	0.928571	14	1	0.928571	13	0.928571
7	right	2	14	0	13	0.928571	14	1	0.928571	13	0.928571
7	right	2	14	1	13	0.928571	12	0.857143	0.785714	12	0.857143
7	right	3	26	0	26	1	25	0.961538	0.961538	25	0.961538
7	right	3	26	1	25	0.961538	25	0.961538	0.923077	24	0.923077
8	right	1	19	0	14	0.736842	17	0.894737	0.631579	12	0.631579
8	right	1	19	1	19	1	18	0.947368	0.947368	18	0.947368
8	right	2	24	0	15	0.625	23	0.958333	0.583333	14	0.583333
8	right	2	24	1	18	0.75	23	0.958333	0.708333	17	0.708333
9	right	1	14	0	11	0.785714	13	0.928571	0.714286	10	0.714286
9	right	1	14	1	13	0.928571	14	1	0.928571	13	0.928571
9	right	2	14	0	11	0.785714	12	0.857143	0.642857	9	0.642857
9	right	2	14	1	13	0.928571	12	0.857143	0.785714	11	0.785714
10	right	1	20	0	16	0.8	18	0.9	0.7	14	0.7
10	right	1	20	1	15	0.75	20	1	0.75	15	0.75
10	right	2	30	0	25	0.833333	27	0.9	0.733333	22	0.733333
10	right	2	30	1	21	0.7	27	0.9	0.6	19	0.633333
11	right	1	15	0	13	0.866667	14	0.933333	0.8	12	0.8
11	right	1	15	1	11	0.733333	14	0.933333	0.666667	10	0.666667
11	right	2	20	0	14	0.7	17	0.85	0.55	11	0.55
11	right	2	20	1	19	0.95	19	0.95	0.9	18	0.9
12	right	1	14	0	6	0.428571	10	0.714286	0.142857	3	0.214286
12	right	1	14	1	8	0.571429	11	0.785714	0.357143	7	0.5
13	right	1	20	0	19	0.95	14	0.7	0.65	13	0.65
13	right	1	20	1	20	1	15	0.75	0.75	15	0.75
13	right	2	26	0	24	0.923077	22	0.846154	0.769231	20	0.769231
13	right	2	26	1	24	0.923077	20	0.769231	0.692308	20	0.769231
13	left	3	18	0	16	0.888889	14	0.777778	0.666667	13	0.722222
13	left	3	17	1	16	0.941176	14	0.823529	0.764706	13	0.764706
