# Supplementary material for: Theta-burst microstimulation in the human entorhinal area improves memory specificity
Source: eLife. 2017 Oct 24;6:e29515. doi: 10.7554/eLife.29515 (PMC5655155; doi:10.7554/eLife.29515)
Supplement: Figure 3—source data 2. [file elife-29515-fig3-data2.xlsx]

## Sheet: TrialByTrialData
ParticipantID	stimHemisphere	trial number	items per block	normalizedTrialNumber	stim	targetPresentedFirst	behavioral outcome	target response	lure response
1	left	1	20	0.05	1	1	1	old	new
1	left	2	20	0.1	0	1	1	old	new
1	left	3	20	0.15	0	0	0	old	old
1	left	4	20	0.2	1	0	0	new	new
1	left	5	20	0.25	0	0	0	old	old
1	left	6	20	0.3	0	0	1	old	new
1	left	7	20	0.35	0	1	1	old	new
1	left	8	20	0.4	1	0	0	new	new
1	left	9	20	0.45	0	0	1	old	new
1	left	10	20	0.5	1	1	0	old	old
1	left	11	20	0.55	1	1	1	old	new
1	left	12	20	0.6	0	1	0	new	new
1	left	13	20	0.65	1	0	0	old	old
1	left	14	20	0.7	1	0	0	old	old
1	left	15	20	0.75	0	0	0	old	old
1	left	16	20	0.8	0	0	0	old	old
1	left	17	20	0.85	1	0	0	old	old
1	left	18	20	0.9	0	1	1	old	new
1	left	19	20	0.95	1	1	1	old	new
1	left	20	20	1	1	1	1	old	new
1	left	1	20	0.05	1	1	1	old	new
1	left	2	20	0.1	1	0	1	old	new
1	left	3	20	0.15	0	0	0	new	old
1	left	4	20	0.2	0	0	0	old	old
1	left	5	20	0.25	0	1	1	old	new
1	left	6	20	0.3	1	1	0	old	old
1	left	7	20	0.35	1	0	0	old	old
1	left	8	20	0.4	1	0	1	old	new
1	left	9	20	0.45	0	0	0	new	new
1	left	10	20	0.5	1	0	0	new	new
1	left	11	20	0.55	1	1	0	old	old
1	left	12	20	0.6	0	1	1	old	new
1	left	13	20	0.65	0	1	0	old	old
1	left	14	20	0.7	0	1	0	new	new
1	left	15	20	0.75	1	0	1	old	new
1	left	16	20	0.8	1	1	0	old	old
1	left	17	20	0.85	1	1	1	old	new
1	left	18	20	0.9	0	1	0	new	new
1	left	19	20	0.95	0	1	1	old	new
1	left	20	20	1	0	0	1	old	new
1	left	1	20	0.05	0	0	1	old	new
1	left	2	20	0.1	1	0	0	old	old
1	left	3	20	0.15	1	1	1	old	new
1	left	4	20	0.2	1	0	0	old	old
1	left	5	20	0.25	0	0	1	old	new
1	left	6	20	0.3	0	1	1	old	new
1	left	7	20	0.35	0	1	1	old	new
1	left	8	20	0.4	1	0	1	old	new
1	left	9	20	0.45	0	1	1	old	new
1	left	10	20	0.5	0	0	0	new	new
1	left	11	20	0.55	0	1	0	new	new
1	left	12	20	0.6	1	1	1	old	new
1	left	13	20	0.65	0	1	1	old	new
1	left	14	20	0.7	0	1	0	new	new
1	left	15	20	0.75	1	1	0	new	new
1	left	16	20	0.8	1	0	0	old	old
1	left	17	20	0.85	1	0	0	old	old
1	left	18	20	0.9	0	1	1	old	new
1	left	19	20	0.95	1	0	0	old	old
1	left	20	20	1	1	1	1	old	new
1	left	1	20	0.05	1	1	1	old	new
1	left	2	20	0.1	0	1	1	old	new
1	left	3	20	0.15	0	1	1	old	new
1	left	4	20	0.2	1	1	1	old	new
1	left	5	20	0.25	0	0	1	old	new
1	left	6	20	0.3	0	1	1	old	new
1	left	7	20	0.35	0	1	1	old	new
1	left	8	20	0.4	1	1	1	old	new
1	left	9	20	0.45	0	1	1	old	new
1	left	10	20	0.5	1	0	1	old	new
1	left	11	20	0.55	1	1	1	old	new
1	left	12	20	0.6	0	0	1	old	new
1	left	13	20	0.65	1	1	1	old	new
1	left	14	20	0.7	1	1	1	old	new
1	left	15	20	0.75	0	0	0	old	old
1	left	16	20	0.8	0	1	1	old	new
1	left	17	20	0.85	1	1	1	old	new
1	left	18	20	0.9	0	0	1	old	new
1	left	19	20	0.95	1	0	1	old	new
1	left	20	20	1	1	0	0	old	old
1	left	1	30	0.033333	0	0	1	old	new
1	left	2	30	0.066667	0	0	1	old	new
1	left	3	30	0.1	0	0	0	old	old
1	left	4	30	0.133333	1	0	1	old	new
1	left	5	30	0.166667	0	0	1	old	new
1	left	6	30	0.2	1	0	1	old	new
1	left	7	30	0.233333	0	0	1	old	new
1	left	8	30	0.266667	0	0	0	old	old
1	left	9	30	0.3	0	1	0	old	old
1	left	10	30	0.333333	1	0	0	new	new
1	left	11	30	0.366667	0	0	0	old	old
1	left	12	30	0.4	1	0	1	old	new
1	left	13	30	0.433333	1	1	1	old	new
1	left	14	30	0.466667	1	1	0	old	old
1	left	15	30	0.5	1	0	1	old	new
1	left	16	30	0.533333	1	0	0	old	old
1	left	17	30	0.566667	1	0	1	old	new
1	left	18	30	0.6	1	0	1	old	new
1	left	19	30	0.633333	0	1	0	old	old
1	left	20	30	0.666667	0	0	1	old	new
1	left	21	30	0.7	0	1	1	old	new
1	left	22	30	0.733333	0	0	1	old	new
1	left	23	30	0.766667	0	1	1	old	new
1	left	24	30	0.8	1	1	0	old	old
1	left	25	30	0.833333	1	0	1	old	new
1	left	26	30	0.866667	1	0	1	old	new
1	left	27	30	0.9	0	1	1	old	new
1	left	28	30	0.933333	0	0	1	old	new
1	left	29	30	0.966667	1	0	1	old	new
1	left	30	30	1	1	0	0	old	old
2	right	1	28	0.035714	1	0	0	old	old
2	right	2	28	0.071429	1	1	1	old	new
2	right	3	28	0.107143	1	1	1	old	new
2	right	4	28	0.142857	1	0	0	new	new
2	right	5	28	0.178571	0	0	0	old	old
2	right	6	28	0.214286	1	0	1	old	new
2	right	7	28	0.25	0	1	0	new	new
2	right	8	28	0.285714	0	0	0	new	new
2	right	9	28	0.321429	0	0	0	old	old
2	right	10	28	0.357143	1	0	0	new	new
2	right	11	28	0.392857	0	1	1	old	new
2	right	12	28	0.428571	0	1	0	old	old
2	right	13	28	0.464286	0	0	0	new	old
2	right	14	28	0.5	1	1	0	old	old
2	right	15	28	0.535714	1	1	0	new	old
2	right	16	28	0.571429	1	0	0	new	old
2	right	17	28	0.607143	1	1	1	old	new
2	right	18	28	0.642857	1	1	1	old	new
2	right	19	28	0.678571	0	1	0	new	new
2	right	20	28	0.714286	0	1	0	new	old
2	right	21	28	0.75	0	0	0	new	new
2	right	22	28	0.785714	0	1	0	old	old
2	right	23	28	0.821429	0	1	0	new	new
2	right	24	28	0.857143	0	0	0	old	old
2	right	25	28	0.892857	0	1	0	new	new
2	right	26	28	0.928571	1	0	0	old	old
2	right	27	28	0.964286	1	1	0	old	old
2	right	28	28	1	1	1	0	old	old
2	right	1	28	0.035714	1	0	1	old	new
2	right	2	28	0.071429	1	0	1	old	new
2	right	3	28	0.107143	1	0	1	old	new
2	right	4	28	0.142857	1	1	0	new	new
2	right	5	28	0.178571	0	1	1	old	new
2	right	6	28	0.214286	1	1	0	new	new
2	right	7	28	0.25	0	0	1	old	new
2	right	8	28	0.285714	0	1	1	old	new
2	right	9	28	0.321429	0	0	1	old	new
2	right	10	28	0.357143	1	1	1	old	new
2	right	11	28	0.392857	0	1	0	new	new
2	right	12	28	0.428571	0	1	0	new	new
2	right	13	28	0.464286	0	1	0	old	old
2	right	14	28	0.5	1	1	0	old	old
2	right	15	28	0.535714	1	0	0	new	old
2	right	16	28	0.571429	1	0	0	old	old
2	right	17	28	0.607143	1	1	0	new	new
2	right	18	28	0.642857	1	0	0	new	new
2	right	19	28	0.678571	0	1	1	old	new
2	right	20	28	0.714286	0	0	1	old	new
2	right	21	28	0.75	0	1	1	old	new
2	right	22	28	0.785714	0	0	1	old	new
2	right	23	28	0.821429	0	1	0	old	old
2	right	24	28	0.857143	0	1	1	old	new
2	right	25	28	0.892857	0	0	0	new	new
2	right	26	28	0.928571	1	0	1	old	new
2	right	27	28	0.964286	1	1	1	old	new
2	right	28	28	1	1	0	1	old	new
2	right	1	28	0.035714	1	0	0	old	old
2	right	2	28	0.071429	1	1	1	old	new
2	right	3	28	0.107143	1	1	1	old	new
2	right	4	28	0.142857	1	0	1	old	new
2	right	5	28	0.178571	0	0	0	old	old
2	right	6	28	0.214286	1	0	1	old	new
2	right	7	28	0.25	0	1	0	new	new
2	right	8	28	0.285714	0	0	0	new	new
2	right	9	28	0.321429	0	0	1	old	new
2	right	10	28	0.357143	1	0	1	old	new
2	right	11	28	0.392857	0	1	0	old	old
2	right	12	28	0.428571	0	1	0	new	old
2	right	13	28	0.464286	0	0	0	old	old
2	right	14	28	0.5	1	1	1	old	new
2	right	15	28	0.535714	1	1	1	old	new
2	right	16	28	0.571429	1	0	1	old	new
2	right	17	28	0.607143	1	1	1	old	new
2	right	18	28	0.642857	1	1	0	old	old
2	right	19	28	0.678571	0	1	0	old	old
2	right	20	28	0.714286	0	1	0	new	old
2	right	21	28	0.75	0	0	0	old	old
2	right	22	28	0.785714	0	1	0	old	old
2	right	23	28	0.821429	0	1	0	old	old
2	right	24	28	0.857143	0	0	0	old	old
2	right	25	28	0.892857	0	1	0	old	old
2	right	26	28	0.928571	1	0	1	old	new
2	right	27	28	0.964286	1	1	0	new	new
2	right	28	28	1	1	1	0	old	old
2	right	1	28	0.035714	0	1	0	old	old
2	right	2	28	0.071429	1	0	1	old	new
2	right	3	28	0.107143	0	1	0	old	old
2	right	4	28	0.142857	0	1	1	old	new
2	right	5	28	0.178571	1	0	0	old	old
2	right	6	28	0.214286	1	0	0	old	old
2	right	7	28	0.25	0	1	1	old	new
2	right	8	28	0.285714	1	1	1	old	new
2	right	9	28	0.321429	0	0	0	old	old
2	right	10	28	0.357143	0	0	0	old	old
2	right	11	28	0.392857	0	0	1	old	new
2	right	12	28	0.428571	1	0	0	old	old
2	right	13	28	0.464286	0	1	1	old	new
2	right	14	28	0.5	0	1	1	old	new
2	right	15	28	0.535714	1	0	1	old	new
2	right	16	28	0.571429	1	0	1	old	new
2	right	17	28	0.607143	0	1	1	old	new
2	right	18	28	0.642857	1	1	0	new	new
2	right	19	28	0.678571	0	1	0	old	old
2	right	20	28	0.714286	1	1	1	old	new
2	right	21	28	0.75	1	1	1	old	new
2	right	22	28	0.785714	1	1	0	new	new
2	right	23	28	0.821429	0	1	1	old	new
2	right	24	28	0.857143	1	1	0	new	old
2	right	25	28	0.892857	1	0	0	old	old
2	right	26	28	0.928571	0	0	0	new	old
2	right	27	28	0.964286	0	1	0	old	old
2	right	28	28	1	1	1	1	old	new
3	left	1	20	0.05	1	1	1	old	new
3	left	2	20	0.1	0	0	0	old	old
3	left	3	20	0.15	0	0	1	old	new
3	left	4	20	0.2	0	1	1	old	new
3	left	5	20	0.25	1	1	1	old	new
3	left	6	20	0.3	1	1	1	old	new
3	left	7	20	0.35	0	1	0	new	new
3	left	8	20	0.4	0	1	0	new	old
3	left	9	20	0.45	0	1	0	new	old
3	left	10	20	0.5	1	1	0	new	old
3	left	11	20	0.55	1	0	1	old	new
3	left	12	20	0.6	1	1	0	new	old
3	left	13	20	0.65	0	0	1	old	new
3	left	14	20	0.7	0	1	1	old	new
3	left	15	20	0.75	1	0	0	old	old
3	left	16	20	0.8	1	0	0	new	old
3	left	17	20	0.85	1	1	0	new	new
3	left	18	20	0.9	1	1	0	new	new
3	left	19	20	0.95	0	1	0	new	new
3	left	20	20	1	0	1	0	new	new
3	left	1	16	0.0625	0	0	1	old	new
3	left	2	16	0.125	1	1	0	new	old
3	left	3	16	0.1875	0	1	0	new	old
3	left	4	16	0.25	1	1	0	old	old
3	left	5	16	0.3125	0	0	0	old	old
3	left	6	16	0.375	0	0	0	old	old
3	left	7	16	0.4375	0	0	1	old	new
3	left	8	16	0.5	0	1	0	old	old
3	left	9	16	0.5625	1	1	0	new	old
3	left	10	16	0.625	1	0	1	old	new
3	left	11	16	0.6875	1	1	1	old	new
3	left	12	16	0.75	1	0	1	old	new
3	left	13	16	0.8125	0	1	0	old	old
3	left	14	16	0.875	1	0	1	old	new
3	left	15	16	0.9375	0	0	0	new	new
3	left	16	16	1	1	1	1	old	new
3	left	1	16	0.0625	0	0	1	old	new
3	left	2	16	0.125	1	0	0	new	new
3	left	3	16	0.1875	0	0	1	old	new
3	left	4	16	0.25	1	1	1	old	new
3	left	5	16	0.3125	0	0	0	old	old
3	left	6	16	0.375	0	0	0	new	old
3	left	7	16	0.4375	1	0	0	new	new
3	left	8	16	0.5	1	0	0	new	new
3	left	9	16	0.5625	0	0	1	old	new
3	left	10	16	0.625	1	1	0	old	old
3	left	11	16	0.6875	0	1	0	new	new
3	left	12	16	0.75	0	0	1	old	new
3	left	13	16	0.8125	1	1	1	old	new
3	left	14	16	0.875	1	0	1	old	new
3	left	15	16	0.9375	1	0	1	old	new
3	left	16	16	1	0	1	1	old	new
3	left	1	16	0.0625	1	0	0	old	old
3	left	2	16	0.125	1	1	0	old	old
3	left	3	16	0.1875	1	1	0	old	old
3	left	4	16	0.25	1	1	0	old	old
3	left	5	16	0.3125	1	0	1	old	new
3	left	6	16	0.375	1	0	1	old	new
3	left	7	16	0.4375	1	1	0	new	old
3	left	8	16	0.5	1	0	0	old	old
3	left	9	16	0.5625	0	1	1	old	new
3	left	10	16	0.625	0	0	1	old	new
3	left	11	16	0.6875	0	1	0	new	new
3	left	12	16	0.75	0	1	0	new	new
3	left	13	16	0.8125	0	0	0	old	old
3	left	14	16	0.875	0	0	1	old	new
3	left	15	16	0.9375	0	1	0	new	old
3	left	16	16	1	0	0	0	old	old
3	left	1	16	0.0625	0	1	0	old	old
3	left	2	16	0.125	0	0	1	old	new
3	left	3	16	0.1875	0	1	0	old	old
3	left	4	16	0.25	0	1	1	old	new
3	left	5	16	0.3125	0	0	0	old	old
3	left	6	16	0.375	0	0	1	old	new
3	left	7	16	0.4375	0	1	1	old	new
3	left	8	16	0.5	0	0	0	old	old
3	left	9	16	0.5625	1	0	0	new	new
3	left	10	16	0.625	1	1	0	old	old
3	left	11	16	0.6875	1	1	0	new	new
3	left	12	16	0.75	1	1	0	new	old
3	left	13	16	0.8125	1	0	1	old	new
3	left	14	16	0.875	1	0	0	new	new
3	left	15	16	0.9375	1	1	1	old	new
3	left	16	16	1	1	0	1	old	new
3	left	1	16	0.0625	1	0	0	new	new
3	left	2	16	0.125	1	1	0	old	old
3	left	3	16	0.1875	1	1	1	old	new
3	left	4	16	0.25	1	1	0	old	old
3	left	5	16	0.3125	1	0	0	old	old
3	left	6	16	0.375	1	0	1	old	new
3	left	7	16	0.4375	1	1	1	old	new
3	left	8	16	0.5	1	0	1	old	new
3	left	9	16	0.5625	0	1	0	old	old
3	left	10	16	0.625	0	0	1	old	new
3	left	11	16	0.6875	0	1	0	old	old
3	left	12	16	0.75	0	1	1	old	new
3	left	13	16	0.8125	0	0	0	new	old
3	left	14	16	0.875	0	0	1	old	new
3	left	15	16	0.9375	0	1	0	old	old
3	left	16	16	1	0	0	0	new	new
3	left	1	16	0.0625	0	1	1	old	new
3	left	2	16	0.125	0	0	1	old	new
3	left	3	16	0.1875	0	1	0	old	old
3	left	4	16	0.25	0	1	0	new	old
3	left	5	16	0.3125	0	0	1	old	new
3	left	6	16	0.375	0	0	0	old	old
3	left	7	16	0.4375	0	1	1	old	new
3	left	8	16	0.5	0	0	0	old	old
3	left	9	16	0.5625	1	0	0	old	old
3	left	10	16	0.625	1	1	0	new	new
3	left	11	16	0.6875	1	1	0	old	old
3	left	12	16	0.75	1	1	1	old	new
3	left	13	16	0.8125	1	0	1	old	new
3	left	14	16	0.875	1	0	0	old	old
3	left	15	16	0.9375	1	1	0	old	old
3	left	16	16	1	1	0	1	old	new
4	left	1	32	0.03125	1	0	1	old	new
4	left	2	32	0.0625	0	0	0	old	old
4	left	3	32	0.09375	0	0	0	new	old
4	left	4	32	0.125	0	0	0	old	old
4	left	5	32	0.15625	0	1	1	old	new
4	left	6	32	0.1875	1	1	1	old	new
4	left	7	32	0.21875	1	0	0	new	new
4	left	8	32	0.25	1	0	0	new	new
4	left	9	32	0.28125	0	0	1	old	new
4	left	10	32	0.3125	1	1	1	old	new
4	left	11	32	0.34375	0	0	1	old	new
4	left	12	32	0.375	0	0	0	new	new
4	left	13	32	0.40625	0	1	0	new	new
4	left	14	32	0.4375	0	0	1	old	new
4	left	15	32	0.46875	1	1	0	new	new
4	left	16	32	0.5	1	0	0	new	new
4	left	17	32	0.53125	1	0	0	new	new
4	left	18	32	0.5625	1	1	0	new	new
4	left	19	32	0.59375	0	0	0	new	old
4	left	20	32	0.625	0	0	0	new	new
4	left	21	32	0.65625	1	0	0	new	new
4	left	22	32	0.6875	0	0	1	old	new
4	left	23	32	0.71875	1	1	0	new	new
4	left	24	32	0.75	1	0	0	new	new
4	left	25	32	0.78125	0	1	0	new	new
4	left	26	32	0.8125	0	1	0	new	new
4	left	27	32	0.84375	0	1	0	new	new
4	left	28	32	0.875	1	1	0	new	new
4	left	29	32	0.90625	0	1	1	old	new
4	left	30	32	0.9375	1	1	0	new	new
4	left	31	32	0.96875	1	1	1	old	new
4	left	32	32	1	1	0	0	new	old
4	left	1	28	0.035714	1	0	0	new	old
4	left	2	28	0.071429	1	1	1	old	new
4	left	3	28	0.107143	1	1	1	old	new
4	left	4	28	0.142857	1	0	0	old	old
4	left	5	28	0.178571	0	0	0	new	old
4	left	6	28	0.214286	1	0	1	old	new
4	left	7	28	0.25	0	1	0	new	new
4	left	8	28	0.285714	0	0	0	new	new
4	left	9	28	0.321429	0	0	0	new	new
4	left	10	28	0.357143	1	0	1	old	new
4	left	11	28	0.392857	0	1	1	old	new
4	left	12	28	0.428571	0	1	0	new	new
4	left	13	28	0.464286	0	0	1	old	new
4	left	14	28	0.5	1	1	1	old	new
4	left	15	28	0.535714	1	1	0	new	new
4	left	16	28	0.571429	1	0	1	old	new
4	left	17	28	0.607143	1	1	0	new	new
4	left	18	28	0.642857	1	1	1	old	new
4	left	19	28	0.678571	0	1	1	old	new
4	left	20	28	0.714286	0	1	1	old	new
4	left	21	28	0.75	0	0	0	new	old
4	left	22	28	0.785714	0	1	0	new	new
4	left	23	28	0.821429	0	1	0	new	new
4	left	24	28	0.857143	0	0	0	old	old
4	left	25	28	0.892857	0	1	0	new	new
4	left	26	28	0.928571	1	0	1	old	new
4	left	27	28	0.964286	1	1	1	old	new
4	left	28	28	1	1	1	1	old	new
4	left	1	28	0.035714	1	0	0	new	old
4	left	2	28	0.071429	1	1	1	old	new
4	left	3	28	0.107143	1	1	1	old	new
4	left	4	28	0.142857	1	0	0	old	old
4	left	5	28	0.178571	0	0	1	old	new
4	left	6	28	0.214286	1	0	0	new	new
4	left	7	28	0.25	0	1	1	old	new
4	left	8	28	0.285714	0	0	1	old	new
4	left	9	28	0.321429	0	0	0	old	old
4	left	10	28	0.357143	1	0	1	old	new
4	left	11	28	0.392857	0	1	1	old	new
4	left	12	28	0.428571	0	1	1	old	new
4	left	13	28	0.464286	0	0	1	old	new
4	left	14	28	0.5	1	1	1	old	new
4	left	15	28	0.535714	1	1	0	new	new
4	left	16	28	0.571429	1	0	0	new	new
4	left	17	28	0.607143	1	1	1	old	new
4	left	18	28	0.642857	1	1	0	new	new
4	left	19	28	0.678571	0	1	1	old	new
4	left	20	28	0.714286	0	1	1	old	new
4	left	21	28	0.75	0	0	0	new	new
4	left	22	28	0.785714	0	1	1	old	new
4	left	23	28	0.821429	0	1	1	old	new
4	left	24	28	0.857143	0	0	1	old	new
4	left	25	28	0.892857	0	1	1	old	new
4	left	26	28	0.928571	1	0	0	new	new
4	left	27	28	0.964286	1	1	0	new	new
4	left	28	28	1	1	1	1	old	new
4	left	1	28	0.035714	1	0	1	old	new
4	left	2	28	0.071429	1	1	1	old	new
4	left	3	28	0.107143	1	1	1	old	new
4	left	4	28	0.142857	1	0	0	old	old
4	left	5	28	0.178571	0	0	0	new	new
4	left	6	28	0.214286	1	0	0	old	old
4	left	7	28	0.25	0	1	1	old	new
4	left	8	28	0.285714	0	0	0	old	old
4	left	9	28	0.321429	0	0	0	new	new
4	left	10	28	0.357143	1	0	1	old	new
4	left	11	28	0.392857	0	1	0	new	new
4	left	12	28	0.428571	0	1	1	old	new
4	left	13	28	0.464286	0	0	0	new	new
4	left	14	28	0.5	1	1	0	new	old
4	left	15	28	0.535714	1	1	1	old	new
4	left	16	28	0.571429	1	0	1	old	new
4	left	17	28	0.607143	1	1	1	old	new
4	left	18	28	0.642857	1	1	1	old	new
4	left	19	28	0.678571	0	1	1	old	new
4	left	20	28	0.714286	0	1	0	new	new
4	left	21	28	0.75	0	0	1	old	new
4	left	22	28	0.785714	0	1	0	new	new
4	left	23	28	0.821429	0	1	1	old	new
4	left	24	28	0.857143	0	0	0	new	new
4	left	25	28	0.892857	0	1	0	new	new
4	left	26	28	0.928571	1	0	1	old	new
4	left	27	28	0.964286	1	1	1	old	new
4	left	28	28	1	1	1	0	new	new
5	left	1	20	0.05	1	1	1	old	new
5	left	2	20	0.1	0	0	1	old	new
5	left	3	20	0.15	0	0	1	old	new
5	left	4	20	0.2	0	1	1	old	new
5	left	5	20	0.25	1	1	1	old	new
5	left	6	20	0.3	1	1	1	old	new
5	left	7	20	0.35	0	1	1	old	new
5	left	8	20	0.4	0	1	1	old	new
5	left	9	20	0.45	0	1	1	old	new
5	left	10	20	0.5	1	1	1	old	new
5	left	11	20	0.55	1	0	1	old	new
5	left	12	20	0.6	1	1	1	old	new
5	left	13	20	0.65	0	0	1	old	new
5	left	14	20	0.7	0	1	1	old	new
5	left	15	20	0.75	1	0	1	old	new
5	left	16	20	0.8	1	0	0	old	old
5	left	17	20	0.85	1	1	1	old	new
5	left	18	20	0.9	1	1	1	old	new
5	left	19	20	0.95	0	1	1	old	new
5	left	20	20	1	0	1	1	old	new
5	left	1	40	0.025	0	0	1	old	new
5	left	2	40	0.05	1	0	1	old	new
5	left	3	40	0.075	0	0	1	old	new
5	left	4	40	0.1	0	0	1	old	new
5	left	5	40	0.125	0	0	0	old	old
5	left	6	40	0.15	0	0	0	old	old
5	left	7	40	0.175	0	0	1	old	new
5	left	8	40	0.2	1	0	0	old	old
5	left	9	40	0.225	1	0	1	old	new
5	left	10	40	0.25	1	1	1	old	new
5	left	11	40	0.275	0	0	1	old	new
5	left	12	40	0.3	1	1	0	old	old
5	left	13	40	0.325	1	0	0	old	old
5	left	14	40	0.35	0	1	1	old	new
5	left	15	40	0.375	1	1	1	old	new
5	left	16	40	0.4	1	0	1	old	new
5	left	17	40	0.425	0	1	1	old	new
5	left	18	40	0.45	1	0	1	old	new
5	left	19	40	0.475	1	1	0	new	new
5	left	20	40	0.5	1	0	1	old	new
5	left	21	40	0.525	1	0	1	old	new
5	left	22	40	0.55	0	1	1	old	new
5	left	23	40	0.575	0	1	1	old	new
5	left	24	40	0.6	1	1	0	old	old
5	left	25	40	0.625	0	0	1	old	new
5	left	26	40	0.65	1	1	1	old	new
5	left	27	40	0.675	1	1	1	old	new
5	left	28	40	0.7	0	0	1	old	new
5	left	29	40	0.725	0	1	0	old	old
5	left	30	40	0.75	1	1	1	old	new
5	left	31	40	0.775	0	0	1	old	new
5	left	32	40	0.8	0	0	1	old	new
5	left	33	40	0.825	1	0	1	old	new
5	left	34	40	0.85	1	0	0	old	old
5	left	35	40	0.875	1	1	1	old	new
5	left	36	40	0.9	0	1	1	old	new
5	left	37	40	0.925	0	1	1	old	new
5	left	38	40	0.95	0	0	1	old	new
5	left	39	40	0.975	1	1	1	old	new
5	left	40	40	1	0	0	1	old	new
6	left	1	28	0.035714	1	0	1	old	new
6	left	2	28	0.071429	1	1	0	old	old
6	left	3	28	0.107143	1	1	1	old	new
6	left	4	28	0.142857	1	0	1	old	new
6	left	5	28	0.178571	0	0	1	old	new
6	left	6	28	0.214286	1	0	0	old	old
6	left	7	28	0.25	0	1	0	old	old
6	left	8	28	0.285714	0	0	1	old	new
6	left	9	28	0.321429	0	0	1	old	new
6	left	10	28	0.357143	1	0	1	old	new
6	left	11	28	0.392857	0	1	1	old	new
6	left	12	28	0.428571	0	1	1	old	new
6	left	13	28	0.464286	0	0	1	old	new
6	left	14	28	0.5	1	1	1	old	new
6	left	15	28	0.535714	1	1	1	old	new
6	left	16	28	0.571429	1	0	0	old	old
6	left	17	28	0.607143	1	1	1	old	new
6	left	18	28	0.642857	1	1	1	old	new
6	left	19	28	0.678571	0	1	1	old	new
6	left	20	28	0.714286	0	1	1	old	new
6	left	21	28	0.75	0	0	0	old	old
6	left	22	28	0.785714	0	1	1	old	new
6	left	23	28	0.821429	0	1	1	old	new
6	left	24	28	0.857143	0	0	1	old	new
6	left	25	28	0.892857	0	1	1	old	new
6	left	26	28	0.928571	1	0	0	new	new
6	left	27	28	0.964286	1	1	1	old	new
6	left	28	28	1	1	1	1	old	new
6	left	1	38	0.026316	0	1	1	old	new
6	left	2	38	0.052632	1	0	1	old	new
6	left	3	38	0.078947	1	0	1	old	new
6	left	4	38	0.105263	0	1	1	old	new
6	left	5	38	0.131579	0	1	0	old	old
6	left	6	38	0.157895	0	0	1	old	new
6	left	7	38	0.184211	1	1	0	old	old
6	left	8	38	0.210526	1	0	1	old	new
6	left	9	38	0.236842	0	1	0	old	old
6	left	10	38	0.263158	0	1	1	old	new
6	left	11	38	0.289474	0	0	1	old	new
6	left	12	38	0.315789	1	0	1	old	new
6	left	13	38	0.342105	1	1	1	old	new
6	left	14	38	0.368421	1	1	1	old	new
6	left	15	38	0.394737	0	0	0	old	old
6	left	16	38	0.421053	0	1	1	old	new
6	left	17	38	0.447368	0	0	1	old	new
6	left	18	38	0.473684	1	0	1	old	new
6	left	19	38	0.5	0	1	1	old	new
6	left	20	38	0.526316	0	0	1	old	new
6	left	21	38	0.552632	1	1	0	old	old
6	left	22	38	0.578947	1	0	1	old	new
6	left	23	38	0.605263	0	0	0	old	old
6	left	24	38	0.631579	1	0	0	new	old
6	left	25	38	0.657895	1	1	1	old	new
6	left	26	38	0.684211	0	1	1	old	new
6	left	27	38	0.710526	1	1	1	old	new
6	left	28	38	0.736842	0	0	1	old	new
6	left	29	38	0.763158	1	1	1	old	new
6	left	30	38	0.789474	1	1	0	new	new
6	left	31	38	0.815789	0	1	1	old	new
6	left	32	38	0.842105	1	0	1	old	new
6	left	33	38	0.868421	0	1	1	old	new
6	left	34	38	0.894737	1	0	1	old	new
6	left	35	38	0.921053	1	1	1	old	new
6	left	36	38	0.947368	0	0	0	old	old
6	left	37	38	0.973684	1	0	0	new	new
6	left	38	38	1	0	0	0	old	old
6	right	1	52	0.019231	0	1	1	old	new
6	right	2	52	0.038462	0	0	1	old	new
6	right	3	52	0.057692	0	0	0	old	old
6	right	4	52	0.076923	1	0	1	old	new
6	right	5	52	0.096154	0	1	1	old	new
6	right	6	52	0.115385	0	1	1	old	new
6	right	7	52	0.134615	0	0	0	new	new
6	right	8	52	0.153846	1	0	1	old	new
6	right	9	52	0.173077	0	0	1	old	new
6	right	10	52	0.192308	0	0	1	old	new
6	right	11	52	0.211538	0	1	1	old	new
6	right	12	52	0.230769	1	1	0	old	old
6	right	13	52	0.25	0	1	0	old	old
6	right	14	52	0.269231	0	1	1	old	new
6	right	15	52	0.288462	0	0	0	old	old
6	right	16	52	0.307692	1	0	1	old	new
6	right	17	52	0.326923	0	1	1	old	new
6	right	18	52	0.346154	1	1	1	old	new
6	right	19	52	0.365385	0	1	1	old	new
6	right	20	52	0.384615	0	0	1	old	new
6	right	21	52	0.403846	1	0	1	old	new
6	right	22	52	0.423077	1	1	1	old	new
6	right	23	52	0.442308	0	1	1	old	new
6	right	24	52	0.461538	0	1	1	old	new
6	right	25	52	0.480769	1	1	1	old	new
6	right	26	52	0.5	1	1	1	old	new
6	right	27	52	0.519231	1	0	1	old	new
6	right	28	52	0.538462	1	1	1	old	new
6	right	29	52	0.557692	1	0	0	old	old
6	right	30	52	0.576923	1	0	0	new	new
6	right	31	52	0.596154	0	1	1	old	new
6	right	32	52	0.615385	1	0	1	old	new
6	right	33	52	0.634615	1	1	0	old	old
6	right	34	52	0.653846	0	1	1	old	new
6	right	35	52	0.673077	0	0	0	new	old
6	right	36	52	0.692308	1	1	1	old	new
6	right	37	52	0.711538	1	1	1	old	new
6	right	38	52	0.730769	0	0	0	old	old
6	right	39	52	0.75	1	1	1	old	new
6	right	40	52	0.769231	1	1	1	old	new
6	right	41	52	0.788462	1	1	1	old	new
6	right	42	52	0.807692	1	0	1	old	new
6	right	43	52	0.826923	1	0	1	old	new
6	right	44	52	0.846154	1	0	1	old	new
6	right	45	52	0.865385	0	0	1	old	new
6	right	46	52	0.884615	0	1	1	old	new
6	right	47	52	0.903846	1	0	0	new	new
6	right	48	52	0.923077	0	0	1	old	new
6	right	49	52	0.942308	1	1	1	old	new
6	right	50	52	0.961538	0	1	1	old	new
6	right	51	52	0.980769	0	0	0	old	old
6	right	52	52	1	1	1	1	old	new
7	right	1	28	0.035714	1	0	1	old	new
7	right	2	28	0.071429	1	1	1	old	new
7	right	3	28	0.107143	1	1	1	old	new
7	right	4	28	0.142857	1	0	1	old	new
7	right	5	28	0.178571	0	0	1	old	new
7	right	6	28	0.214286	1	0	1	old	new
7	right	7	28	0.25	0	1	0	old	old
7	right	8	28	0.285714	0	0	1	old	new
7	right	9	28	0.321429	0	0	1	old	new
7	right	10	28	0.357143	1	0	1	old	new
7	right	11	28	0.392857	0	1	0	new	new
7	right	12	28	0.428571	0	1	1	old	new
7	right	13	28	0.464286	0	0	1	old	new
7	right	14	28	0.5	1	1	1	old	new
7	right	15	28	0.535714	1	1	1	old	new
7	right	16	28	0.571429	1	0	1	old	new
7	right	17	28	0.607143	1	1	1	old	new
7	right	18	28	0.642857	1	1	1	old	new
7	right	19	28	0.678571	0	1	1	old	new
7	right	20	28	0.714286	0	1	1	old	new
7	right	21	28	0.75	0	0	1	old	new
7	right	22	28	0.785714	0	1	1	old	new
7	right	23	28	0.821429	0	1	1	old	new
7	right	24	28	0.857143	0	0	1	old	new
7	right	25	28	0.892857	0	1	0	new	new
7	right	26	28	0.928571	1	0	1	old	new
7	right	27	28	0.964286	1	1	1	old	new
7	right	28	28	1	1	1	0	new	new
7	right	1	28	0.035714	1	0	1	old	new
7	right	2	28	0.071429	1	1	1	old	new
7	right	3	28	0.107143	1	1	1	old	new
7	right	4	28	0.142857	1	0	0	new	old
7	right	5	28	0.178571	0	0	1	old	new
7	right	6	28	0.214286	1	0	1	old	new
7	right	7	28	0.25	0	1	1	old	new
7	right	8	28	0.285714	0	0	1	old	new
7	right	9	28	0.321429	0	0	0	new	new
7	right	10	28	0.357143	1	0	1	old	new
7	right	11	28	0.392857	0	1	1	old	new
7	right	12	28	0.428571	0	1	1	old	new
7	right	13	28	0.464286	0	0	1	old	new
7	right	14	28	0.5	1	1	1	old	new
7	right	15	28	0.535714	1	1	1	old	new
7	right	16	28	0.571429	1	0	1	old	new
7	right	17	28	0.607143	1	1	1	old	new
7	right	18	28	0.642857	1	1	1	old	new
7	right	19	28	0.678571	0	1	1	old	new
7	right	20	28	0.714286	0	1	1	old	new
7	right	21	28	0.75	0	0	1	old	new
7	right	22	28	0.785714	0	1	1	old	new
7	right	23	28	0.821429	0	1	1	old	new
7	right	24	28	0.857143	0	0	1	old	new
7	right	25	28	0.892857	0	1	1	old	new
7	right	26	28	0.928571	1	0	0	old	old
7	right	27	28	0.964286	1	1	1	old	new
7	right	28	28	1	1	1	1	old	new
7	right	1	52	0.019231	0	1	1	old	new
7	right	2	52	0.038462	0	0	1	old	new
7	right	3	52	0.057692	0	0	1	old	new
7	right	4	52	0.076923	1	0	1	old	new
7	right	5	52	0.096154	0	1	1	old	new
7	right	6	52	0.115385	0	1	1	old	new
7	right	7	52	0.134615	0	0	1	old	new
7	right	8	52	0.153846	1	0	1	old	new
7	right	9	52	0.173077	0	0	1	old	new
7	right	10	52	0.192308	0	0	1	old	new
7	right	11	52	0.211538	0	1	1	old	new
7	right	12	52	0.230769	1	1	1	old	new
7	right	13	52	0.25	0	1	1	old	new
7	right	14	52	0.269231	0	1	1	old	new
7	right	15	52	0.288462	0	0	1	old	new
7	right	16	52	0.307692	1	0	1	old	new
7	right	17	52	0.326923	0	1	1	old	new
7	right	18	52	0.346154	1	1	1	old	new
7	right	19	52	0.365385	0	1	1	old	new
7	right	20	52	0.384615	0	0	1	old	new
7	right	21	52	0.403846	1	0	1	old	new
7	right	22	52	0.423077	1	1	1	old	new
7	right	23	52	0.442308	0	1	1	old	new
7	right	24	52	0.461538	0	1	1	old	new
7	right	25	52	0.480769	1	1	1	old	new
7	right	26	52	0.5	1	1	0	new	new
7	right	27	52	0.519231	1	0	1	old	new
7	right	28	52	0.538462	1	1	1	old	new
7	right	29	52	0.557692	1	0	1	old	new
7	right	30	52	0.576923	1	0	1	old	new
7	right	31	52	0.596154	0	1	1	old	new
7	right	32	52	0.615385	1	0	0	old	old
7	right	33	52	0.634615	1	1	1	old	new
7	right	34	52	0.653846	0	1	1	old	new
7	right	35	52	0.673077	0	0	1	old	new
7	right	36	52	0.692308	1	1	1	old	new
7	right	37	52	0.711538	1	1	1	old	new
7	right	38	52	0.730769	0	0	1	old	new
7	right	39	52	0.75	1	1	1	old	new
7	right	40	52	0.769231	1	1	1	old	new
7	right	41	52	0.788462	1	1	1	old	new
7	right	42	52	0.807692	1	0	1	old	new
7	right	43	52	0.826923	1	0	1	old	new
7	right	44	52	0.846154	1	0	1	old	new
7	right	45	52	0.865385	0	0	0	old	old
7	right	46	52	0.884615	0	1	1	old	new
7	right	47	52	0.903846	1	0	1	old	new
7	right	48	52	0.923077	0	0	1	old	new
7	right	49	52	0.942308	1	1	1	old	new
7	right	50	52	0.961538	0	1	1	old	new
7	right	51	52	0.980769	0	0	1	old	new
7	right	52	52	1	1	1	1	old	new
8	right	1	38	0.026316	1	1	1	old	new
8	right	2	38	0.052632	1	0	1	old	new
8	right	3	38	0.078947	1	0	0	old	old
8	right	4	38	0.105263	1	0	1	old	new
8	right	5	38	0.131579	0	0	1	old	new
8	right	6	38	0.157895	1	1	1	old	new
8	right	7	38	0.184211	1	1	1	old	new
8	right	8	38	0.210526	1	0	1	old	new
8	right	9	38	0.236842	0	0	0	old	old
8	right	10	38	0.263158	1	1	1	old	new
8	right	11	38	0.289474	1	0	1	old	new
8	right	12	38	0.315789	0	0	0	new	new
8	right	13	38	0.342105	1	1	1	old	new
8	right	14	38	0.368421	1	0	1	old	new
8	right	15	38	0.394737	1	0	1	old	new
8	right	16	38	0.421053	0	1	1	old	new
8	right	17	38	0.447368	0	1	1	old	new
8	right	18	38	0.473684	0	1	0	new	new
8	right	19	38	0.5	0	0	1	old	new
8	right	20	38	0.526316	0	0	1	old	new
8	right	21	38	0.552632	1	0	1	old	new
8	right	22	38	0.578947	0	0	1	old	new
8	right	23	38	0.605263	0	0	0	old	old
8	right	24	38	0.631579	0	1	0	new	new
8	right	25	38	0.657895	0	0	1	old	new
8	right	26	38	0.684211	1	0	1	old	new
8	right	27	38	0.710526	0	1	1	old	new
8	right	28	38	0.736842	0	1	0	new	new
8	right	29	38	0.763158	0	1	1	old	new
8	right	30	38	0.789474	0	1	1	old	new
8	right	31	38	0.815789	1	1	1	old	new
8	right	32	38	0.842105	0	1	1	old	new
8	right	33	38	0.868421	1	0	1	old	new
8	right	34	38	0.894737	0	0	1	old	new
8	right	35	38	0.921053	1	0	1	old	new
8	right	36	38	0.947368	1	0	1	old	new
8	right	37	38	0.973684	0	0	0	new	new
8	right	38	38	1	1	1	1	old	new
8	right	1	48	0.020833	0	0	0	old	old
8	right	2	48	0.041667	1	1	1	old	new
8	right	3	48	0.0625	1	0	1	old	new
8	right	4	48	0.083333	0	1	0	new	new
8	right	5	48	0.104167	1	1	1	old	new
8	right	6	48	0.125	1	1	0	new	new
8	right	7	48	0.145833	0	0	0	new	new
8	right	8	48	0.166667	0	1	1	old	new
8	right	9	48	0.1875	0	1	1	old	new
8	right	10	48	0.208333	0	0	0	new	new
8	right	11	48	0.229167	1	0	1	old	new
8	right	12	48	0.25	1	0	1	old	new
8	right	13	48	0.270833	1	0	1	old	new
8	right	14	48	0.291667	1	1	0	new	new
8	right	15	48	0.3125	1	0	1	old	new
8	right	16	48	0.333333	0	0	1	old	new
8	right	17	48	0.354167	0	0	1	old	new
8	right	18	48	0.375	1	0	0	new	new
8	right	19	48	0.395833	0	1	1	old	new
8	right	20	48	0.416667	1	0	1	old	new
8	right	21	48	0.4375	1	1	1	old	new
8	right	22	48	0.458333	1	0	1	old	new
8	right	23	48	0.479167	0	1	1	old	new
8	right	24	48	0.5	1	1	1	old	new
8	right	25	48	0.520833	0	0	0	new	new
8	right	26	48	0.541667	1	1	0	new	new
8	right	27	48	0.5625	0	1	1	old	new
8	right	28	48	0.583333	0	1	1	old	new
8	right	29	48	0.604167	1	1	1	old	new
8	right	30	48	0.625	0	0	1	old	new
8	right	31	48	0.645833	1	1	1	old	new
8	right	32	48	0.666667	0	1	1	old	new
8	right	33	48	0.6875	0	0	0	new	new
8	right	34	48	0.708333	1	0	0	new	new
8	right	35	48	0.729167	1	0	0	old	old
8	right	36	48	0.75	1	0	1	old	new
8	right	37	48	0.770833	0	0	0	new	new
8	right	38	48	0.791667	1	1	1	old	new
8	right	39	48	0.8125	1	1	1	old	new
8	right	40	48	0.833333	1	0	1	old	new
8	right	41	48	0.854167	0	0	0	new	new
8	right	42	48	0.875	0	0	0	new	new
8	right	43	48	0.895833	0	0	0	new	new
8	right	44	48	0.916667	0	0	1	old	new
8	right	45	48	0.9375	0	0	1	old	new
8	right	46	48	0.958333	0	1	1	old	new
8	right	47	48	0.979167	0	1	1	old	new
8	right	48	48	1	1	1	0	new	new
9	right	1	28	0.035714	1	0	0	new	new
9	right	2	28	0.071429	1	1	1	old	new
9	right	3	28	0.107143	1	1	1	old	new
9	right	4	28	0.142857	1	0	1	old	new
9	right	5	28	0.178571	0	0	0	new	new
9	right	6	28	0.214286	1	0	1	old	new
9	right	7	28	0.25	0	1	0	new	new
9	right	8	28	0.285714	0	0	1	old	new
9	right	9	28	0.321429	0	0	1	old	new
9	right	10	28	0.357143	1	0	1	old	new
9	right	11	28	0.392857	0	1	1	old	new
9	right	12	28	0.428571	0	1	1	old	new
9	right	13	28	0.464286	0	0	0	old	old
9	right	14	28	0.5	1	1	1	old	new
9	right	15	28	0.535714	1	1	1	old	new
9	right	16	28	0.571429	1	0	1	old	new
9	right	17	28	0.607143	1	1	1	old	new
9	right	18	28	0.642857	1	1	1	old	new
9	right	19	28	0.678571	0	1	1	old	new
9	right	20	28	0.714286	0	1	1	old	new
9	right	21	28	0.75	0	0	1	old	new
9	right	22	28	0.785714	0	1	1	old	new
9	right	23	28	0.821429	0	1	1	old	new
9	right	24	28	0.857143	0	0	0	new	new
9	right	25	28	0.892857	0	1	1	old	new
9	right	26	28	0.928571	1	0	1	old	new
9	right	27	28	0.964286	1	1	1	old	new
9	right	28	28	1	1	1	1	old	new
9	right	1	28	0.035714	0	1	0	new	new
9	right	2	28	0.071429	1	0	0	old	old
9	right	3	28	0.107143	0	1	0	old	old
9	right	4	28	0.142857	0	1	1	old	new
9	right	5	28	0.178571	1	0	1	old	new
9	right	6	28	0.214286	1	0	0	old	old
9	right	7	28	0.25	0	1	1	old	new
9	right	8	28	0.285714	1	1	1	old	new
9	right	9	28	0.321429	0	0	0	new	new
9	right	10	28	0.357143	0	0	1	old	new
9	right	11	28	0.392857	0	0	1	old	new
9	right	12	28	0.428571	1	0	1	old	new
9	right	13	28	0.464286	0	1	1	old	new
9	right	14	28	0.5	0	1	1	old	new
9	right	15	28	0.535714	1	0	1	old	new
9	right	16	28	0.571429	1	0	0	new	new
9	right	17	28	0.607143	0	1	1	old	new
9	right	18	28	0.642857	1	1	1	old	new
9	right	19	28	0.678571	0	1	0	old	old
9	right	20	28	0.714286	1	1	1	old	new
9	right	21	28	0.75	1	1	1	old	new
9	right	22	28	0.785714	1	1	1	old	new
9	right	23	28	0.821429	0	1	0	new	new
9	right	24	28	0.857143	1	1	1	old	new
9	right	25	28	0.892857	1	0	1	old	new
9	right	26	28	0.928571	0	0	1	old	new
9	right	27	28	0.964286	0	1	1	old	new
9	right	28	28	1	1	1	1	old	new
10	right	1	40	0.025	1	0	0	new	new
10	right	2	40	0.05	0	0	1	old	new
10	right	3	40	0.075	0	0	1	old	new
10	right	4	40	0.1	0	1	1	old	new
10	right	5	40	0.125	1	0	1	old	new
10	right	6	40	0.15	1	1	1	old	new
10	right	7	40	0.175	0	0	1	old	new
10	right	8	40	0.2	1	1	1	old	new
10	right	9	40	0.225	1	1	1	old	new
10	right	10	40	0.25	1	0	1	old	new
10	right	11	40	0.275	1	1	0	new	new
10	right	12	40	0.3	1	0	1	old	new
10	right	13	40	0.325	1	1	1	old	new
10	right	14	40	0.35	0	0	1	old	new
10	right	15	40	0.375	0	1	1	old	new
10	right	16	40	0.4	0	1	1	old	new
10	right	17	40	0.425	0	0	1	old	new
10	right	18	40	0.45	1	0	1	old	new
10	right	19	40	0.475	1	1	1	old	new
10	right	20	40	0.5	0	1	1	old	new
10	right	21	40	0.525	0	1	0	new	new
10	right	22	40	0.55	0	1	0	old	old
10	right	23	40	0.575	0	0	1	old	new
10	right	24	40	0.6	0	1	0	new	new
10	right	25	40	0.625	0	1	0	new	new
10	right	26	40	0.65	0	0	1	old	new
10	right	27	40	0.675	0	0	0	new	new
10	right	28	40	0.7	1	1	1	old	new
10	right	29	40	0.725	1	1	0	new	new
10	right	30	40	0.75	0	1	1	old	new
10	right	31	40	0.775	1	1	1	old	new
10	right	32	40	0.8	0	1	1	old	new
10	right	33	40	0.825	1	0	0	new	new
10	right	34	40	0.85	1	1	1	old	new
10	right	35	40	0.875	0	0	0	old	old
10	right	36	40	0.9	1	1	1	old	new
10	right	37	40	0.925	1	0	1	old	new
10	right	38	40	0.95	1	1	1	old	new
10	right	39	40	0.975	1	0	0	new	new
10	right	40	40	1	0	1	1	old	new
10	right	1	60	0.016667	0	0	0	old	old
10	right	2	60	0.033333	1	1	1	old	new
10	right	3	60	0.05	0	1	1	old	new
10	right	4	60	0.066667	0	0	1	old	new
10	right	5	60	0.083333	1	0	1	old	new
10	right	6	60	0.1	0	1	1	old	new
10	right	7	60	0.116667	1	0	1	old	new
10	right	8	60	0.133333	1	1	0	old	old
10	right	9	60	0.15	0	0	1	old	new
10	right	10	60	0.166667	1	0	1	old	new
10	right	11	60	0.183333	0	0	1	old	new
10	right	12	60	0.2	1	1	0	new	new
10	right	13	60	0.216667	1	1	1	old	new
10	right	14	60	0.233333	1	0	1	old	new
10	right	15	60	0.25	1	0	0	old	old
10	right	16	60	0.266667	1	1	1	old	new
10	right	17	60	0.283333	0	1	0	old	old
10	right	18	60	0.3	1	0	0	new	new
10	right	19	60	0.316667	0	0	0	new	new
10	right	20	60	0.333333	0	0	1	old	new
10	right	21	60	0.35	1	0	0	new	new
10	right	22	60	0.366667	1	1	1	old	new
10	right	23	60	0.383333	0	1	1	old	new
10	right	24	60	0.4	1	0	0	new	new
10	right	25	60	0.416667	0	0	1	old	new
10	right	26	60	0.433333	1	1	1	old	new
10	right	27	60	0.45	1	1	0	new	new
10	right	28	60	0.466667	0	0	0	new	new
10	right	29	60	0.483333	0	0	1	old	new
10	right	30	60	0.5	1	0	1	old	new
10	right	31	60	0.516667	1	1	0	new	new
10	right	32	60	0.533333	0	0	1	old	new
10	right	33	60	0.55	0	1	0	new	new
10	right	34	60	0.566667	0	0	1	old	new
10	right	35	60	0.583333	0	1	1	old	new
10	right	36	60	0.6	1	1	0	new	new
10	right	37	60	0.616667	1	0	1	old	new
10	right	38	60	0.633333	1	1	1	old	new
10	right	39	60	0.65	0	0	1	old	new
10	right	40	60	0.666667	0	1	1	old	new
10	right	41	60	0.683333	1	0	1	old	new
10	right	42	60	0.7	0	0	0	new	new
10	right	43	60	0.716667	1	0	1	old	new
10	right	44	60	0.733333	1	0	0	new	new
10	right	45	60	0.75	0	1	1	old	new
10	right	46	60	0.766667	0	1	1	old	new
10	right	47	60	0.783333	0	0	0	new	new
10	right	48	60	0.8	0	1	1	old	new
10	right	49	60	0.816667	0	0	1	old	new
10	right	50	60	0.833333	1	1	1	old	new
10	right	51	60	0.85	0	1	1	old	new
10	right	52	60	0.866667	0	0	0	old	old
10	right	53	60	0.883333	1	1	1	old	new
10	right	54	60	0.9	1	0	1	old	new
10	right	55	60	0.916667	0	1	1	old	new
10	right	56	60	0.933333	1	0	0	new	old
10	right	57	60	0.95	1	0	1	old	new
10	right	58	60	0.966667	1	0	1	old	new
10	right	59	60	0.983333	0	0	1	old	new
10	right	60	60	1	0	0	1	old	new
11	right	1	30	0.033333	0	0	1	old	new
11	right	2	30	0.066667	0	0	1	old	new
11	right	3	30	0.1	0	1	1	old	new
11	right	4	30	0.133333	1	0	1	old	new
11	right	5	30	0.166667	0	0	1	old	new
11	right	6	30	0.2	0	1	1	old	new
11	right	7	30	0.233333	1	1	1	old	new
11	right	8	30	0.266667	1	1	0	old	old
11	right	9	30	0.3	1	1	0	new	new
11	right	10	30	0.333333	0	1	0	new	new
11	right	11	30	0.366667	0	0	0	old	old
11	right	12	30	0.4	1	0	1	old	new
11	right	13	30	0.433333	0	0	1	old	new
11	right	14	30	0.466667	1	1	0	new	new
11	right	15	30	0.5	1	1	0	new	new
11	right	16	30	0.533333	0	0	1	old	new
11	right	17	30	0.566667	0	0	1	old	new
11	right	18	30	0.6	1	1	1	old	new
11	right	19	30	0.633333	0	1	1	old	new
11	right	20	30	0.666667	1	1	0	new	new
11	right	21	30	0.7	1	0	1	old	new
11	right	22	30	0.733333	1	1	1	old	new
11	right	23	30	0.766667	1	1	1	old	new
11	right	24	30	0.8	1	0	1	old	new
11	right	25	30	0.833333	1	1	1	old	new
11	right	26	30	0.866667	1	0	1	old	new
11	right	27	30	0.9	0	1	0	new	new
11	right	28	30	0.933333	0	0	1	old	new
11	right	29	30	0.966667	0	1	1	old	new
11	right	30	30	1	0	0	1	old	new
11	right	1	40	0.025	0	1	0	new	new
11	right	2	40	0.05	0	0	0	new	new
11	right	3	40	0.075	0	1	1	old	new
11	right	4	40	0.1	0	1	1	old	new
11	right	5	40	0.125	1	1	1	old	new
11	right	6	40	0.15	1	0	1	old	new
11	right	7	40	0.175	0	0	1	old	new
11	right	8	40	0.2	1	1	1	old	new
11	right	9	40	0.225	0	1	1	old	new
11	right	10	40	0.25	1	1	1	old	new
11	right	11	40	0.275	1	1	1	old	new
11	right	12	40	0.3	0	0	0	new	new
11	right	13	40	0.325	0	1	1	old	new
11	right	14	40	0.35	1	0	1	old	new
11	right	15	40	0.375	1	1	1	old	new
11	right	16	40	0.4	0	0	1	old	new
11	right	17	40	0.425	1	0	1	old	new
11	right	18	40	0.45	0	1	0	old	old
11	right	19	40	0.475	1	1	1	old	new
11	right	20	40	0.5	1	0	1	old	new
11	right	21	40	0.525	1	0	0	old	old
11	right	22	40	0.55	0	1	1	old	new
11	right	23	40	0.575	1	0	1	old	new
11	right	24	40	0.6	0	0	0	new	new
11	right	25	40	0.625	1	0	1	old	new
11	right	26	40	0.65	0	0	1	old	new
11	right	27	40	0.675	1	0	1	old	new
11	right	28	40	0.7	1	1	1	old	new
11	right	29	40	0.725	0	0	1	old	new
11	right	30	40	0.75	1	1	1	old	new
11	right	31	40	0.775	0	1	1	old	new
11	right	32	40	0.8	1	1	1	old	new
11	right	33	40	0.825	1	0	1	old	new
11	right	34	40	0.85	0	1	1	old	new
11	right	35	40	0.875	0	0	0	old	old
11	right	36	40	0.9	0	1	0	old	old
11	right	37	40	0.925	1	0	0	new	new
11	right	38	40	0.95	1	0	1	old	new
11	right	39	40	0.975	0	1	0	new	new
11	right	40	40	1	0	1	0	new	new
12	right	1	28	0.035714	0	1	0	old	old
12	right	2	28	0.071429	1	0	1	old	new
12	right	3	28	0.107143	1	0	1	old	new
12	right	4	28	0.142857	0	0	0	old	old
12	right	5	28	0.178571	0	0	0	new	old
12	right	6	28	0.214286	0	1	1	old	new
12	right	7	28	0.25	0	1	0	new	new
12	right	8	28	0.285714	1	1	1	old	new
12	right	9	28	0.321429	1	1	0	new	new
12	right	10	28	0.357143	1	0	0	new	new
12	right	11	28	0.392857	0	1	1	old	new
12	right	12	28	0.428571	0	0	0	new	new
12	right	13	28	0.464286	1	0	0	old	old
12	right	14	28	0.5	0	0	0	new	new
12	right	15	28	0.535714	1	1	1	old	new
12	right	16	28	0.571429	0	0	1	old	new
12	right	17	28	0.607143	0	1	0	new	new
12	right	18	28	0.642857	1	1	1	old	new
12	right	19	28	0.678571	1	1	0	new	old
12	right	20	28	0.714286	1	1	0	new	new
12	right	21	28	0.75	1	0	1	old	new
12	right	22	28	0.785714	1	1	0	new	old
12	right	23	28	0.821429	0	0	0	new	new
12	right	24	28	0.857143	0	0	0	new	new
12	right	25	28	0.892857	1	0	0	new	new
12	right	26	28	0.928571	0	0	0	new	new
12	right	27	28	0.964286	1	0	1	old	new
12	right	28	28	1	0	1	0	old	old
13	right	1	40	0.025	0	0	1	old	new
13	right	2	40	0.05	0	0	0	old	old
13	right	3	40	0.075	0	1	1	old	new
13	right	4	40	0.1	0	0	0	old	old
13	right	5	40	0.125	1	0	0	old	old
13	right	6	40	0.15	1	0	1	old	new
13	right	7	40	0.175	0	0	1	old	new
13	right	8	40	0.2	1	1	1	old	new
13	right	9	40	0.225	0	1	0	new	new
13	right	10	40	0.25	1	1	1	old	new
13	right	11	40	0.275	1	0	1	old	new
13	right	12	40	0.3	0	0	0	old	old
13	right	13	40	0.325	0	1	1	old	new
13	right	14	40	0.35	1	0	1	old	new
13	right	15	40	0.375	1	1	1	old	new
13	right	16	40	0.4	0	1	1	old	new
13	right	17	40	0.425	1	1	1	old	new
13	right	18	40	0.45	0	0	1	old	new
13	right	19	40	0.475	1	0	0	old	old
13	right	20	40	0.5	1	0	1	old	new
13	right	21	40	0.525	1	0	1	old	new
13	right	22	40	0.55	0	1	1	old	new
13	right	23	40	0.575	1	1	1	old	new
13	right	24	40	0.6	0	0	1	old	new
13	right	25	40	0.625	1	0	0	old	old
13	right	26	40	0.65	0	0	0	old	old
13	right	27	40	0.675	1	1	1	old	new
13	right	28	40	0.7	1	0	1	old	new
13	right	29	40	0.725	0	0	1	old	new
13	right	30	40	0.75	1	0	1	old	new
13	right	31	40	0.775	0	0	1	old	new
13	right	32	40	0.8	1	0	1	old	new
13	right	33	40	0.825	1	1	1	old	new
13	right	34	40	0.85	0	1	0	old	old
13	right	35	40	0.875	0	0	1	old	new
13	right	36	40	0.9	0	1	1	old	new
13	right	37	40	0.925	1	0	0	old	old
13	right	38	40	0.95	1	1	0	old	old
13	right	39	40	0.975	0	0	1	old	new
13	right	40	40	1	0	1	0	old	old
13	right	1	52	0.019231	0	1	1	old	new
13	right	2	52	0.038462	0	1	1	old	new
13	right	3	52	0.057692	0	0	0	new	new
13	right	4	52	0.076923	1	1	1	old	new
13	right	5	52	0.096154	0	0	0	old	old
13	right	6	52	0.115385	0	0	1	old	new
13	right	7	52	0.134615	0	0	0	old	old
13	right	8	52	0.153846	1	1	1	old	new
13	right	9	52	0.173077	0	1	1	old	new
13	right	10	52	0.192308	0	0	1	old	new
13	right	11	52	0.211538	0	0	1	old	new
13	right	12	52	0.230769	1	1	0	old	old
13	right	13	52	0.25	0	1	1	old	new
13	right	14	52	0.269231	0	0	1	old	new
13	right	15	52	0.288462	0	0	0	old	old
13	right	16	52	0.307692	1	0	1	old	new
13	right	17	52	0.326923	0	0	1	old	new
13	right	18	52	0.346154	1	1	1	old	new
13	right	19	52	0.365385	0	1	1	old	new
13	right	20	52	0.384615	0	1	1	old	new
13	right	21	52	0.403846	1	1	1	old	new
13	right	22	52	0.423077	1	1	1	old	new
13	right	23	52	0.442308	0	0	1	old	new
13	right	24	52	0.461538	0	1	1	old	new
13	right	25	52	0.480769	1	0	1	old	new
13	right	26	52	0.5	1	0	1	old	new
13	right	27	52	0.519231	1	1	1	old	new
13	right	28	52	0.538462	1	0	1	old	new
13	right	29	52	0.557692	1	1	1	old	new
13	right	30	52	0.576923	1	1	1	old	new
13	right	31	52	0.596154	0	1	0	new	new
13	right	32	52	0.615385	1	0	0	old	old
13	right	33	52	0.634615	1	0	1	old	new
13	right	34	52	0.653846	0	0	1	old	new
13	right	35	52	0.673077	0	1	1	old	new
13	right	36	52	0.692308	1	1	1	old	new
13	right	37	52	0.711538	1	0	1	old	new
13	right	38	52	0.730769	0	1	1	old	new
13	right	39	52	0.75	1	1	1	old	new
13	right	40	52	0.769231	1	1	1	old	new
13	right	41	52	0.788462	1	1	1	old	new
13	right	42	52	0.807692	1	0	0	old	old
13	right	43	52	0.826923	1	0	0	new	old
13	right	44	52	0.846154	1	0	0	old	old
13	right	45	52	0.865385	0	0	1	old	new
13	right	46	52	0.884615	0	0	0	old	old
13	right	47	52	0.903846	1	1	1	old	new
13	right	48	52	0.923077	0	0	1	old	new
13	right	49	52	0.942308	1	1	0	new	old
13	right	50	52	0.961538	0	0	1	old	new
13	right	51	52	0.980769	0	0	1	old	new
13	right	52	52	1	1	0	1	old	new
13	left	1	52	0.019231	0	1	0	old	old
13	left	2	52	0.038462	0	1	1	old	new
13	left	3	52	0.057692	0	0	1	old	new
13	left	4	52	0.076923	1	1	1	old	new
13	left	5	52	0.096154	0	0	1	old	new
13	left	6	52	0.115385	0	0	1	old	new
13	left	8	52	0.153846	1	1	0	new	new
13	left	10	52	0.192308	0	0	0	old	old
13	left	12	52	0.230769	1	1	1	old	new
13	left	17	52	0.326923	0	0	1	old	new
13	left	19	52	0.365385	0	1	1	old	new
13	left	20	52	0.384615	0	1	1	old	new
13	left	22	52	0.423077	1	1	0	old	old
13	left	23	52	0.442308	0	0	1	old	new
13	left	24	52	0.461538	0	1	0	new	old
13	left	25	52	0.480769	1	0	1	old	new
13	left	27	52	0.519231	1	1	0	old	old
13	left	28	52	0.538462	1	0	0	old	old
13	left	29	52	0.557692	1	1	1	old	new
13	left	30	52	0.576923	1	1	1	old	new
13	left	32	52	0.615385	1	0	1	old	new
13	left	33	52	0.634615	1	0	1	old	new
13	left	34	52	0.653846	0	0	1	old	new
13	left	35	52	0.673077	0	1	0	new	new
13	left	37	52	0.711538	1	0	1	old	new
13	left	38	52	0.730769	0	1	1	old	new
13	left	40	52	0.769231	1	1	1	old	new
13	left	41	52	0.788462	1	1	1	old	new
13	left	42	52	0.807692	1	0	1	old	new
13	left	44	52	0.846154	1	0	1	old	new
13	left	46	52	0.884615	0	0	1	old	new
13	left	47	52	0.903846	1	1	1	old	new
13	left	48	52	0.923077	0	0	1	old	new
13	left	50	52	0.961538	0	0	1	old	new
13	left	51	52	0.980769	0	0	0	old	old
